# Supplementary material
Source: publisher figshare collection journal article supplement (https://acs.figshare.com/ndownloader/files/3739528)
Supplement: Supplementary file 1 [file 3739528]

# Supporting Information for “Dopants Control Electron-Hole Recombination at Perovskite-TiO<sub>2</sub> Interfaces: *Ab Initio* Time-Domain Study”

Run Long<sup>1,2\*</sup>, Oleg V. Prezhdo<sup>3†</sup>

<sup>1</sup>*College of Chemistry, Key Laboratory of Theoretical & Computational Photochemistry of Ministry of Education, Beijing Normal University, Beijing, 100875, P. R. China*

<sup>2</sup>*School of Physics, Complex & Adaptive Systems Lab, University College Dublin, Ireland*

<sup>3</sup>*Department of Chemistry, University of Southern California, Los Angeles, CA 90089, USA*

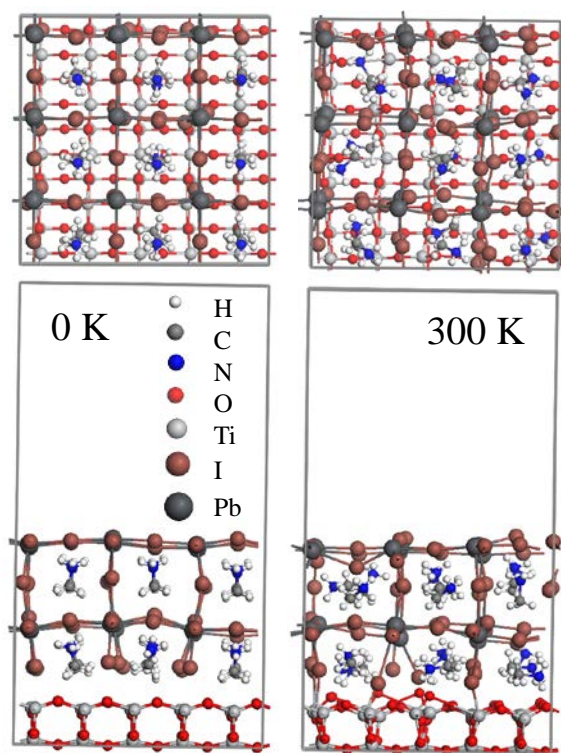

**Figure S1.** Top and side views of the simulation cell showing geometry of the interface between the 2 layer MAPbI<sub>3</sub> (100) surface and the TiO<sub>2</sub> anatase (001) surface at 0 K (top panel) and 300 K (bottom panel). Thermal atomic motions alter the geometries and affect the electron donor-acceptor interaction. The geometries at both 0 K and 300 K maintain the major characteristic of the interface between the one layer MAPbI<sub>3</sub>(100) surface and the TiO<sub>2</sub>-anatase(001) surface, Figure 2.

\* Corresponding author, E-mail: runlong@bnu.edu.cn

† Corresponding author, E-mail: prezhdo@usc.edu

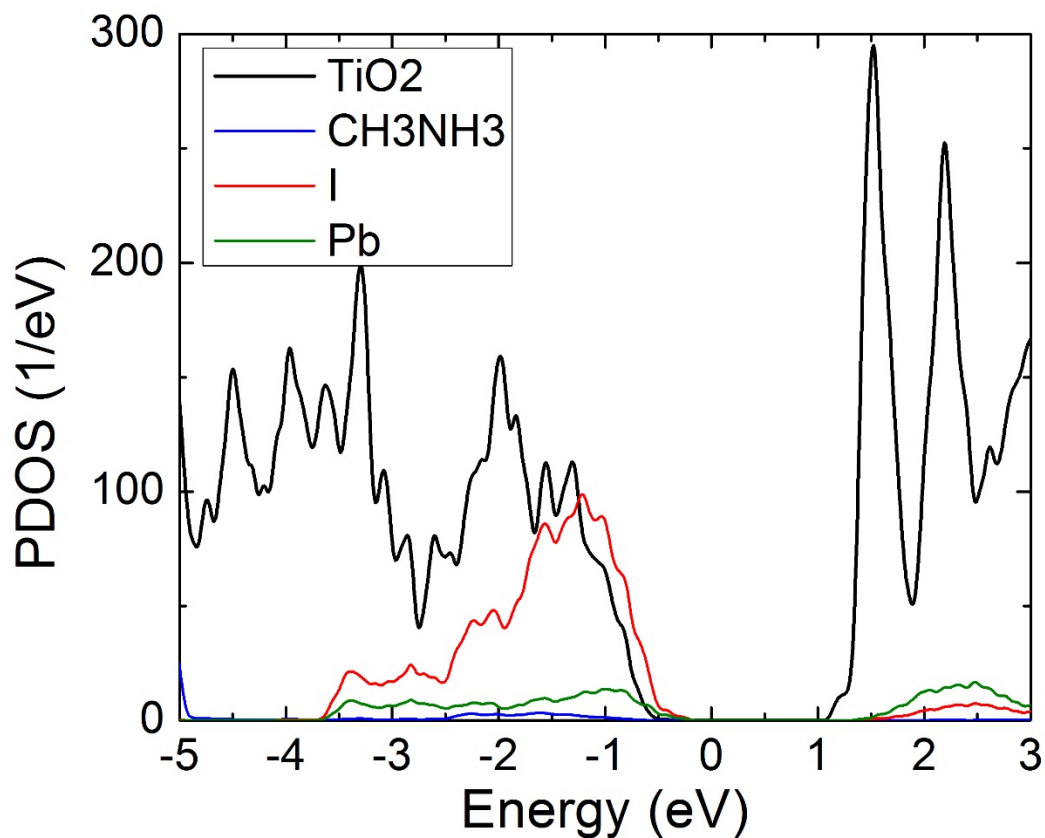

**Figure S2.** Projected density states (PDOS) of the TiO<sub>2</sub> anatase (001) surface interfaced with the 2 layer MAPbI<sub>3</sub> (100) surface at 0 K, Figure S1. The PDOS is split into contribution from TiO<sub>2</sub>, CH<sub>3</sub>NH<sub>3</sub>, I and Pb. The PDOS is nearly identical to the PDOS obtained for the TiO<sub>2</sub> anatase (001) surface interfaced with the 1 layer MAPbI<sub>3</sub>(100) surface, Figure 1b.

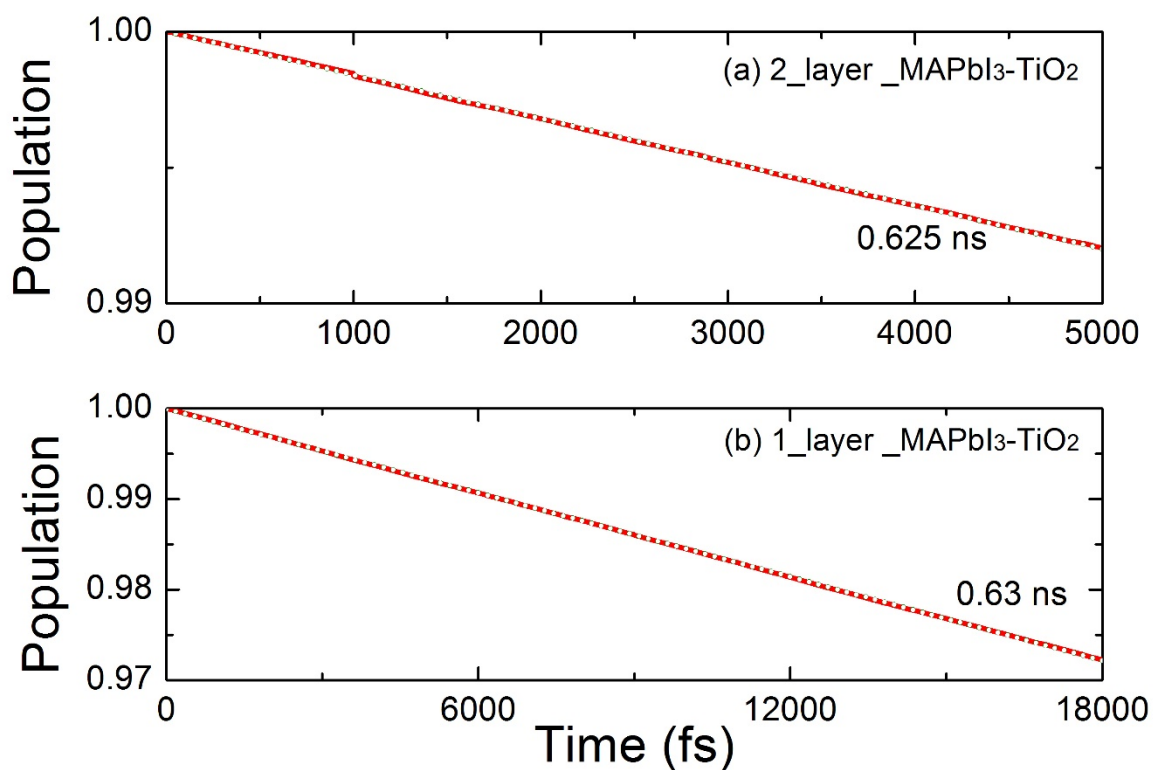

**Figure S3.** Electron-hole recombination dynamics at the interface between **(a)** the TiO<sub>2</sub>-anatase (001) and the 2 layer MAPbI<sub>3</sub>(100) surface, and **(b)** the TiO<sub>2</sub>-anatase (001) surface and the 1 layer MAPbI<sub>3</sub>(100) surface. The circles are linear fits. Both time scales agree well with the result obtained for the 1 layer system over a shorter time interval, Figure 7, demonstrating that the 1 layer MAPbI<sub>3</sub>(100)/TiO<sub>2</sub>-anatase(001) model is capable of describing the interfacial electron-hole recombination dynamics.
